# Supplementary material
Source: MDPI journal article supplement (https://www.mdpi.com/1999-4907/7/10/229)
Supplement: s1 [file s1]

Supplementary Materials: Operational Research Techniques Used for Addressing Biodiversity Objectives into Forest Management: An Overview

Marta Ezquerro, Marta Pardos and Luis Diaz-Balteiro

**References**

1. Alagador, D.; Cerdeira, J.O. Designing spatially-explicit reserve networks in the presence of mandatory sites. *J. Appl. Ecol*. **2007**, *137*, 254–262.
2. Alagador, D.; Cerdeira, J.O.; Araújo, M.B. Shifting protected areas: Scheduling spatial priorities under climate change. *J. Appl. Ecol*. **2014**, *51*, 703–713.
3. Alagador, D.; Triviño, M.; Cerdeira, J.O.; Brás, R.; Cabeza, M.; Araújo, M.B. Linking like with like: Optimising connectivity between environmentally-similar habitats. *Landsc. Ecol*. **2012**, *27*, 291–301.
4. Batabyal, A.A. On some aspects of the decision to conserve or harvest old growth forest. *J. Environ. Manag*. **1998**, *54*, 15–21.
5. Bergseng, E.; Ask, J.A.; Framstad, E.; Gobakken, T.; Solberg, B.; Hoen, H.F. Biodiversity protection and economics in long term boreal forest management—A detailed case for the valuation of protection measures. *For. Policy Econ*. **2012**, *15*, 12–21.
6. Bertomeu, M.; Romero, C. Managing forest biodiversity: A zero-one goal programming approach. *Agric. Syst*. **2001**, *68*, 197–213.
7. Bertomeu, M.; Romero, C. Forest management optimisation models and habitat diversity: A goal programming approach. *J. Oper. Res. Soc*. **2002**, *53*, 1175–1184.
8. Bettinger, P.; Boston, K.; Sessions, J. Combinatorial optimization of elk habitat effectiveness and timber harvest volume. *Environ. Model. Asses*. **1999**, *4*, 143–153.
9. Bettinger, P.; Graetz, D.; Boston, K.; Sessions, J.; Chung, W. Eight Heuristic Planning Techniques Applied to Three Increasingly Difﬁcult Wildlife Planning Problems. *Silva Fenn*. **2002**, *36*, 561–584.
10. Bettinger, P.; Johnson, D.L.; Johnson, K.N. Spatial forest plan development with ecological and economic goals. *Ecol. Model*. **2003**, *169*, 215–236.
11. Bettinger, P.; Sessions, J.; Boston, K. Using Tabu search to schedule timber harvests subject to spatial wildlife goals for big game. *Ecol. Model*. **1997**, *94*, 111–123.
12. Bevers, M.; Hof, J. Spatially Optimizing Wildlife Habitat Edge Effects in Forest Management Linear and Mixed-Integer Programs. *For. Sci*. **1999**, *45*, 249-258.
13. Billionnet, A. Optimal selection of forest patches using integer and fractional programming. *Oper. Res*. **2010**, *10*, 1–26.
14. Billionnet, A. Spatial Optimization of Wildlife Populations with Probabilistic Habitat Connections. *For. Sci*. **2011**, *57*, 336–342.
15. Bojórquez-Tapia, L.A. Environmental conflicts and nature reserves: Redesigning Sierra San Pedro Mártir National Park, Mexico. *Biol. Conserv*. **2004**, *117*, 111–126.
16. Bojórquez-Tapia, L.A.; Brower, L.P.; Castilleja, G.; Sánchez-Colón, S.; Hernández, M., Calvert, W.; Díaz, S.; Gómez-Priego, P.; Alcantar, G.; Melgarejo, E.D.; et al. Mapping expert knowledge: Redesigning the Monarch Butterfly Biosphere reserve. *Conserv. Biol*. **2003**, *17*, 367–379.
17. Bos, J. Zoning in Forest Management: A Quadratic Assignment Problem solved by Simmulated Annealing. *J. Environ. Manag*. **1993**, *37*, 127–145.
18. Boston, K.; Bettinger, P. Development of Spatially Feasible Forest Plans: A Comparison of Two Modeling Approaches. *Silva Fenn*. **2001**, *35*, 425–435.
19. Boston, K.; Bettinger, P. The economic impact of green-up constraints in the southeastern United States. *For. Ecol. Manag*. **2001**, *145*, 191–202.
20. Bouchard, M.; Garet, J.R. A framework to optimize the restoration and retention of large mature forest tracts in managed boreal landscapes. *Ecol. Appl*. **2014**, *24*, 1689–1704.
21. Boyland, M.; Nelson, J.; Bunnell, F.L. Creating land allocation zones for forest management: A simulated annealing approach. *Can. J. For. Res*. **2004**, *34*, 1669–1682.
22. Briceño-Elizondo, E.; Jäger, D.; Lexer, M.J.; Garcia-Gonzalo, J.; Peltola, H.; Kellomäki, S. Multi-criteria evaluation of multi-purpose stand treatment programmes for Finnish boreal forests under changing climate. *Ecol. Indic*. **2008**, *8*, 26–45.
23. Brown, G.S.; Rettie, W.J.; Brooks, R.J.; Mallory, F.F. Predicting the impacts of forest management on woodland caribou habitat suitability in black spruce boreal forest. *For. Ecol. Manag*. **2007**, *245*, 137–147.
24. Bryan, B.A.; Crossman, N.D. Systematic regional planning for multiple objective natural resource management. *J. Environ. Manag*. **2008**, *88*, 1175–1189.
25. Buongiorno, J.; Peyron, J.-L.; Houllier, F.; Bruciamacchie, M. Growth and Management of Mixed-Species, Uneven-Aged Forests in the French Jura: Implications for Economic Returns and Tree Diversity. *For. Sci*. **1995**, *41*, 397–429.
26. Burns, E.S.; Tóth, S.F.; Haight, R.G. A modeling framework for life history-based conservation planning. *Biol. Conserv*. **2013**, *158*, 14–25.
27. Calkin, D.E.; Montgomery, C.A.; Schumaker, N.H.; Polasky, S.; Arthur, J.L.; Nalle, D.J. Developing a production possibility set of wildlife species persistence and timber harvest value. *Can. J. For. Res*. **2002**, *32*, 1329–1342.
28. Caro, F.; Constantino, M.; Martins, I.; Weintraub, A. A 2-Opt tabu search procedure for the multiperiod forest harvesting problem with adjacency, greenup, old grouth and even flow constraints. *For. Sci*. **2003**, *49*, 738–751.
29. Carvajal, R.; Constantino, M.; Goycoolea, M.; Vielma, J.P.; Weintraub, A. Imposing Connectivity Constraints in Forest Planning Models. *Oper. Res*. **2013**, *61*, 824–836.
30. Cerdeira, J.O.; Gaston, K.J.; Pinto, L.S. Connectivity in priority area selection for conservation. *Environ.* *Model. Assess*. **2005**, *10*, 183–192.
31. Chen, Y.; Chang, C. Multi-coefficient goal programming in thinning schedules to increase carbon sequestration and improve forest structure. *Ann. For. Sci*. **2014**, *71*, 907–915.
32. Constantino, M.; Martins, I.; Borges, J.G. A New Mixed-Integer Programming Model for Harvest Scheduling Subject to Maximum Area Restrictions. *Oper. Res*. **2008**, *56*, 542–551.
33. Cotter, M.; Berkhoff, K.; Gibreel, T.; Ghorbani, A.; Golbon, R.; Nuppenau, E.A.; Sauerborn, J. Designing a sustainable land use scenario based on a combination of ecological assessments and economic optimization. *Ecol. Indic*. **2014**, *36*, 779–787.
34. Cox, E.S.; Sullivan, J. Harvest Scheduling with Spatial Wildlife Constraints: An Empirical Examination of Tradeoffs. *J. Environ. Manag*. **1995**, *43*, 333–348.
35. Crossman, N.D.; Bryan, B.A. Systematic landscape restoration using integer programming. *Biol. Conserv*. **2006**, *128*, 369–383.
36. Davis, F.W.; Costello, C.; Stoms, D. Efficient Conservation in a Utility-Maximization Framework. *Ecol. Soc*. **2006**, *11*, 33.
37. De Oliveira Averna Valente, R.; Vettorazzi, C.A. Comparison between methods of multi-criteria evaluation, in a GIS environment, aiming at forest conservation and preservation [Comparação entre métodos de avaliação multicriterial, em ambiente SIG, para a conservação e a preservação florestal]. *For. Sci*. **2005**, *69*, 51–61.
38. De Oliveira Averna Valente, R.; Vettorazzi, C.A. Deﬁnition of priority areas for forest conservation through the ordered weighted averaging method. *For. Ecol. Manag*. **2008**, *256*, 1408–1417.
39. De Sousa Xavier A.M.; Costa Freitas, M.B.; de Sousa Fragoso, R.M. Management of Mediterranean forests—A compromise programming approach considering different stakeholders and different objectives. *For. Policy Econ*. **2015**, *57*, 38–46.
40. Dhar, A.; Ruprecht, H.; Vacik, H. Population viability risk management (PVRM) for in situ management of endangered tree species—A case study on a *Taxus baccata* L. population. *For. Ecol. Manag*. **2008**, *255*, 2835–2845.
41. Di Minin, E.; Hunter, L.T.B.; Balme, G.A.; Smith, R.J.; Goodman, P.S.; Slotow, R. Creating Larger and Better Connected Protected Areas Enhances the Persistence of Big Game Species in the Maputaland-Pondoland-Albany Biodiversity Hotspot. *PLoS ONE* **2013**, *8*, e71788.
42. Ducheyne, E.I.; De Wulf, R.R.; De Baets, B. A spatial approach to forest-management optimization: Linking GIs and multiple objective genetic algorithms. *Int. J. Geogr. Inf. Sci*. **2007**, *20*, 917–928.
43. Ekvall, H.; Bostedt, G.; Jonsson, M. Least-cost allocation of measures to increase the amount of coarse woody debris in forest estates. *J. For. Econ*. **2013**, *19*, 267–285.
44. Falcao, A.O.; Borges, J. Combining random and systematic search heuristic procedures for solving spatially constrained forest management schedulling models. *For. Sci*. **2002**, *48*, 608–621.
45. Fisher, D.T.; Church, R.L. Clustering and compactness in reserve site selection: An extention of the biodiversity management area selection model. *For. Sci*. **2003**, *49*, 555–565.
46. Fonseca, T.F.; Cerveira, A.; Mota, A. An integer programming model for a forest harvest problem in *Pinus pinaster* stands. *For. Syst*. **2012**, *21*, 272–283.
47. Fooks, J.R.; Messer, K.D. Maximizing conservation and in-kind cost share: Applying Goal Programming to forest protection. *J. For. Econ*. **2012**, *18*, 207–217.
48. Fuller, T.; Munguía, M.; Mayfield, M.; Sánchez-Cordero, V.; Sarkar, S. Incorporating connectivity into conservation planning: A multi-criteria case study from central Mexico. *Biol. Conserv*. **2006**, *133*, 131–142.
49. Fürstenau, C.; Badeck, F.W.; Lasch, P.; Lexer, M.J.; Lindner, M.; Mohr, P.; Suckow, F. Multiple-use forest management in consideration of climate change and the interests of stakeholder groups. *Eur. J. For. Res*. **2007**, *126*, 225–239.
50. Geneletti, D.; van Duren, I. Protected area zoning for conservation and use: A combination of spatial multicriteria and multiobjective evaluation. *Landsc. Urban Plan*. **2008**, *85*, 97–110.
51. Glover, F.; Ching-Chung, K.; Dhir, K.S. A discrete optimization model for preserving biological diversity. *Appl. Math. Model*. **1995**, *19*, 696–701.
52. Gonzalez, J.R.; Pukkala T.; Palahí, M. Optimising the management of *Pinus sylvestris* L. stand under risk of fire in Catalonia (north-east of Spain). *Ann. For. Sci*. **2005**, *62*, 493–501.
53. Grošelj, P.; Zadnik Stirn, L. Between compromise and consensus in group decisions in forest management. *Sumar. List* **2013**, *137*, 403–410.
54. Habib, T.J.; Farr, D.R.; Schneider, R.R.; Boutin, S. Economic and Ecological Outcomes of Flexible Biodiversity Offset Systems. *Conserv. Biol*. **2013**, *27*, 1313–1323.
55. Haight, R.G. Comparing Extinction Risk and Economic Cost in Wildlife Conservation Planning. *Ecol. Appl*. **1995**, *5*, 767–775.
56. Haight, R.G.; Revelle, C.S.; Snyder, S.A. An Integer Optimization Approach to a Probabilistic Reserve Site Selection Problem. *Oper. Res*. **2000**, *48*, 697–708.
57. Haight, R.G.; Travis, L.E. Wildlife Conservation Planning Using Stochastic Optimization and importance Sampling. *For. Sci*. **1997**, *43*, 129–139.
58. Hauer, G.; Cumming, S.; Schmiegelow, F.; Adamowicz, W.; Weber, M.; Jagodzinski, R. Tradeoffs between forestry resource and conservation values under alternate policy regimes: A spatial analysis of the western Canadian boreal plains. *Ecol. Model*. **2010**, *221*, 2590–2603.
59. Heinonen, T.; Pukkala, T. A Comparison of One- and Two- Compartment Neighbourhoods in Heuristic Search with Spatial Forest Management Goals. *Silva Fenn*. **2004**, *38*, 319–332.
60. Higgins, A.J.; Hajkowicz, S. A Model for Landscape Planning under Complex Spatial Conditions. *Environ. Model. Assess*. **2007**, *13*, 459–471.
61. Hjortsø, C.N.; Stræde, S.; Helles, F. Applying multi-criteria decision-making to protected areas and buffer zone management: A case study in the Royal Chitwan National Park, Nepal. *J. For. Econ*. **2006**, *12*, 91–108.
62. Hof, J.; Bevers, M.; Joyce, L.; Kent, B. An Integer Programming Approach for Spatially and Temporally Optimizing Wildlife Population. *For. Sci*. **1994**, *40*, 177–191.
63. Hof, J.; Raphael, M.G. Optimization of habitat placement: A case study of the northern spotted owl in the olympic peninsula. *Ecol. Appl*. **2015**, *7*, 1160–1169.
64. Hof, J.G.; Joyce, L.A. Spatial Optimization for Wildlife and Timber in Managed Forest Ecosystems. *For. Sci*. **1992**, *38*, 489–508.
65. Hof, J.G.; Joyce, L.A. A Mixed Integer Linear Programming Approach for Spatially Optimizing Wildlife and Timber in Managed Forest Ecosystem. *For. Sci*. **1993**, *39*, 816–834.
66. Holzkämper, A.; Lausch, A.; Seppelt, R. Optimizing landscape configuration to enhance habitat suitability for species with contrasting habitat requirements. *Ecol. Model*. **2006**, *198*, 277–292.
67. Huang, W.; Luukkanen, O.; Johansson, S.; Kaarakka, V.; Räisänen, S.; Vihemäki, H. Agroforestry for biodiversity conservation of nature reserves: Functional group identification and analysis. *Agrofor. Syst*. **2001**, *55*, 65–72.
68. Hurme, E.; Kurttila, M.; Mönkkönen, M.; Heinonen, T.; Pukkala, T. Maintenance of flying squirrel habitat and timber harvest: A site-specific spatial model in forest planning calculations. *Landsc. Ecol*. **2007**, *22*, 243–256.
69. Jantke, K.; Schneider, U.A. Integrating Land Market Feedbacks into Conservation Planning—A Mathematical Programming Approach. *Environ. Model. Assess*. **2011**, *16*, 227–238.
70. Jantz, P.; Goetz, S.; Laporte, N. Carbon stock corridors to mitigate climate change and promote biodiversity in the tropics. *Nat. Clim. Chang*. **2014**, *4*, 138–142.
71. Jordi, K.C.; Peddie, D. A wildlife management problem: A case study in multiple-objective linear programming. *J. Oper. Res. Soc*. **1988**, *39*, 1011–1020.
72. Juutinen, A.; Mantymaa, E.; Monkkonen, M.; Salmi, J. A cost-efficient approach to selecting forest stands for conserving species: A case study from northern Fennoscandia. *For. Sci*. **2004**, *50*, 527–539.
73. Juutinen, A.; Mönkkönen, M. Testing alternative indicators for biodiversity conservation in old-growth boreal forests: Ecology and economics. *Ecol. Econ*. **2004**, *50*, 35–48.
74. Juutinen, A.; Reunanen, P.; Mönkkönen, M.; Tikkanen, O.P.; Kouki, J. Conservation of forest biodiversity using temporal conservation contracts. *Ecol. Econ*. **2012**, *81*, 121–129.
75. Kangas, A.S.; Kangas, J.; Pykäläinen, J. Outranking Methods as Tools in Strategic Natural Resources Planning. *Silva Fenn*. **2001**, *35*, 215–227.
76. Kangas, J.; Hokkanen, J.; Kangas, A.S.; Lahdelma, R.; Salminen, P. Applying Stochastic Multicriteria Acceptability Analysis to Forest Ecosystem Management with Both Cardinal and Ordinal Criteria. *For. Sci*. **2003**, *49*, 928–937.
77. Kangas, J.; Karsikko, J.; Laasonen, L.; Pukkala, T. A method for estimating the suitability function of wildlife habitat for forest planning on the basis of expertise. *Silva Fenn*. **1993**, *27*, 259–268.
78. Kangas, J.; Kuusipalo, J. Integrating biodiversity into forest management planning and decision-making. *For. Ecol. Manag*. **1993**, *61*, 1–15.
79. Kangas, J.; Leskinen, P. Modelling ecological expertise for forest planning calculations-rationale, examples, and pitfalls. *J. Environ. Manag*. **2005**, *76*, 125–133.
80. Kangas, J.; Pukkala, T. Operationalization of biodiversity as a decision objective in tactical forest planning. *Can. J. For. Res*. **1996**, *26*, 103–111.
81. Kašpar, J.; Marušák, R.; Hlavatý, R. A Forest Planning Approach with Respect to the Creation of Overmature Reserved Areas in Managed Forests. *Forests* **2015**, *6*, 328–343.
82. Kint, V.; Lasch, P.; Lindner, M.; Muys, B. Multipurpose conversion management of Scots pine towards mixed oak-birch stands-A long-term simulation approach. *For. Ecol. Manag*. **2009**, *257*, 199–214.
83. Knoke, T.; Moog, M. Timber harvesting versus forest reserves—Producer prices for open-use areas in German beech forests (*Fagus sylvatica* L.). *Ecol. Econ*. **2005**, *52*, 97–110.
84. Könnyu, N.; Tóth, S.F.; McDill, M.E.; Rajasekaran, B. Temporal Connectivity of Mature Forest Patches in Spatially-Explicit Harvest Scheduling Models. *For. Sci*. **2014**, *60*, 1089–1099.
85. Korosuo, A.; Heinonen, T.; Ohman, K.; Holmstrom, H.; Eriksson, L.O. Spatial Optimization in Forest Planning Using Different Fragmentation Measures. *For. Sci*. **2014**, *60*, 764–775.
86. Krcmar, E.; Van Kooten, G.C.; Vertinsky, I. Managing forest and marginal agricultural land for multiple tradeoffs: Compromising on economic, carbon and structural diversity objectives. *Ecol. Model*. **2005**, *185*, 451–468.
87. Kurttila, M.; Leskinen, P.; Pykäläinen, J.; Ruuskanen, T. Forest owners’ decision support in voluntary biodiversity-protection projects. *Silva Fenn*. **2008**, *42*, 643–658.
88. Kurttila, M.; Pukkala, T.; Loikkanen, J. The performance of alternative spatial objective types in forest planning calculations: A case for flying squirrel and moose. *For. Ecol. Manag*. **2002**, *166*, 245–260.
89. Kurttila, M.; Pykäläinen, J.; Leskinen, P. Defining the forest landowner’s utility–loss compensative subsidy level for a biodiversity object. *Eur. J. For. Res*. **2005**, *125*, 67–78.
90. Kuusipalo, J.; Kangas, J. Managing biodiversity in a forestry environment. *Conserv. Biol*. **1994**, *8*, 450–460.
91. Lawler, J.J.; White, D.; Master, L.L. Integrating Representation and Vulnerability: Two Approaches for Prioritizing Areas for Conservation. *Ecol. Appl*. **2003**, *13*, 1762–1772.
92. Leskinen, P.; Kangas, J. Multi-criteria natural resource management with preferentially dependent decision criteria. *J. Environ. Manag*. **2005**, *77*, 244–251.
93. Leskinen, P.; Kangas, J.; Pasanen, A.M. Assessing ecological values with dependent explanatory variables in multi-criteria forest ecosystem management. *Ecol. Model*. **2003**, *170*, 1–12.
94. Lexer, M.J.; Seidl, R. Addressing biodiversity in a stakeholder-driven climate change vulnerability assessment of forest management. *For. Ecol. Manag*. **2009**, *258*, S158–S167.
95. Lichtenstein, M.E.; Montgomery, C.A. Biodiversity and Timber in the Coast Range of Oregon: Inside the Production Possibility Frontier. *Land Econ*. **2003**, *79*, 56–73.
96. Lin, C.; Buongiorno, J. Tree diversity, landscape diversity, and economics of maple-birch forests: Implications of Markovian models. *Manag. Sci*. **1998**, *44*, 1351–1366.
97. Liu, G.; Nelson, J.D.; Wardman, C.W. A target-oriented approach to forest ecosystem design-changing the rules of forest planning. *Ecol. Model*. **2000**, *127*, 269–281.
98. Locher, A.; Campa, H.; Leefers, L.; Beyer, D.E. Understanding Cumulative Effects of Aspen Harvest on Wildlife Habitat and Timber Resources in Northern Michigan. *North. J. Appl. For*. **2012**, *29*, 113–127.
99. Ludwin, W.G.; Chamberlain, P.A. Habitat management decisions with goal programming. *Wildl. Soc. Bull*. **1989**, *17*, 20–23.
100. Lundström, J.; Öhman, K.; Perhans, K.; Rönnqvist, M.; Gustafsson, L.; Bugman, H. Cost-effective age structure and geographical distribution of boreal forest reserves. *J. Appl. Ecol*. **2011**, *48*, 133–142.
101. Lundström, J.; Öhman, K.; Rönnqvist, M.; Gustafsson, L. How reserve selection is affected by preferences in Swedish boreal forests. *For. Policy Econ*. **2014**, *41*, 40–50.
102. Mac Nally, R. The lag dæmon: Hysteresis in rebuilding landscapes and implications for biodiversity futures. *J. Environ. Manag*. **2008**, *88*, 1202–1211.
103. MacMillan, D.C.; Marshall, K. Optimising capercailzie habitat in commercial forestry plantations. *For. Ecol. Manag*. **2004**, *198*, 351–365.
104. Maeshiro, R.; Kusumoto, B.; Fujii, S.; Shiono, T.; Kubota, Y. Using tree functional diversity to evaluate management impacts in a subtropical forest. *Ecosphere* **2013**, *4*, 1–17.
105. Marshalek, E.C.; Ramage, B.S.; Potts, M.D. Integrating harvest scheduling and reserve design to improve biodiversity conservation. *Ecol. Model*. **2014**, *287*, 27–35.
106. Martin, T.; Chadès, I.; Arcese, P.; Marra, P.P.; Possingham, H.P.; Norris, D.R. Optimal conservation of migratory species. *PLoS ONE* **2007**, *2*, e751.
107. Marusak R.; Káspar J.; Hlavaty R.; Kotek V.; Kuzêlka K.; Vopênka P. Alternative Modelling Approach to Spatial Harvest Scheduling with Respect to Fragmentation of Forest Ecosystem. *Environ. Manag*. **2015**, *56*, 1134–1147.
108. Mathey, A.; Krcmar, E.; Dragicevic, S.; Vertinsky, I. An object-oriented cellular automata model for forest planning problems. *Ecol. Model*. **2007**, *2*, 359–371.
109. Mathey, A.; Krcmar, E.; Tait, D.; Vertinsky, I.; Innes, J. Forest planning using co-evolutionary cellular automata. *For. Ecol. Manag*. **2007**, *239*, 45–56.
110. Mathey, A.; Krcmar, E.; Innes, J.; Vertinsky, I. Opportunities and costs of intensification and clustering of forest management activities. *Can. J. For. Res*. **2008**, *38*, 711–720.
111. Memtsas, D.P. Multiobjective programming methods in the reserve selection problem. *Eur. J. Oper. Res*. **2003**, *150*, 640–652.
112. Mendoza, G.A. A multiobjective programming framework for integrating timber and wildlife management. *Environ. Manag*. **1988**, *12*, 163–171.
113. Moffett, A.; Dyer, J.S.; Sarkar, S. Integrating biodiversity representation with multiple criteria in North-Central Namibia using non-dominated alternatives and a modified analytic hierarchy process. *Biol. Conserv*. **2006**, *129*, 181–191.
114. Moilanen, A. Methods for reserve selection: Interior point search. *Biol. Conserv*. **2005**, *124*, 485–492.
115. Moilanen, A. Reserve selection using nonlinear species distribution models. *Am. Nat*. **2005**, *165*, 695–706.
116. Moilanen, A. Landscape Zonation, benefit functions and target-based planning: Unifying reserve selection strategies. *Biol. Conserv*. **2007**, *134*, 571–579.
117. Mönkkönen, M.; Juutinen, A.; Mazziotta, A.; Miettinen, K.; Podkopaev, D.; Reunanen, P.; Salminen, H.; Tikkanen, O.-P. Spatially dynamic forest management to sustain biodiversity and economic returns. *J. Environ. Manag*. **2014**, *134*, 80–89.
118. Moore, C.T.; Conroy, M.J. Optimal regeneration planning for old-growth forest: Addressing scientific uncertainty in endangered species recovery through adaptive management. *For. Sci*. **2006**, *52*, 155–172.
119. Moreira, J.M.M.A.P.; Rodriguez, L.C.E.; Caixeta-Filho, J.V. An Optimization Model to Integrate Forest Plantations and Connecting Corridors. *For. Sci.* **2013**, *59*, 661–670.
120. Murray, A.T.; Goycoolea, M.; Weintraub, A. Incorporating average and maximum area restrictions in harvest scheduling models. *Can. J. For. Res*. **2004**, *34*, 456–464.
121. Nalle, D.J.; Arthur, J.L.; Montgomery, C.A. Economic impacts of adjacency and green-up constraints on timber production at a landscape scale. *J. For. Econ*. **2004**, *10*, 189–205.
122. Nalle, D.J.; Montgomery, C.A.; Arthur, J.L.; Polasky, S.; Schumaker, N.H. Modeling joint production of wildlife and timber. *J. Environ. Econ. Manag*. **2004**, *48*, 997–1017.
123. Nevo, A.; Garcia, L. Spatial optimization of wildlife habitat. *Ecol. Model*. **1996**, *91*, 271–281.
124. Nghiem, N. Optimal rotation age for carbon sequestration and biodiversity conservation in Vietnam. *For. Policy Econ*. **2014**, *38*, 56–64.
125. Nicholson, E.; Westphal, M.I.; Frank, K.; Rochester, W.A.; Pressey, R.L.; Lindenmayer, D.B.; Possingham, H.P. A new method for conservation planning for the persistence of multiple species. *Ecol. Lett*. **2006**, *9*, 1049–1060.
126. Öhman, K. Creating continuous areas of old forest in long-term forest planning. *Can. J. For. Res*. **2000**, *30*, 1817–1823.
127. Öhman, K.; Edenius, L.; Mikusiński, G. Optimizing spatial habitat suitability and timber revenue in long-term forest planning. *Can. J. For. Res*. **2011**, *41*, 543–551.
128. Öhman, K.; Eriksson, L.O. The core area concept in forming contiguous areas for long-term forest planning. *Can. J. For. Res*. **1998**, *28*, 1032–1039.
129. Öhman, K.; Eriksson, L.O. Allowing for spatial consideration in long-term forest planning by linking linear programming with simulated annealing. *For. Ecol. Manag*. **2002**, *161*, 221–230.
130. Öhman, K.; Eriksson, L.O. Aggregating Harvest Activities in Long Term Forest Planning by Minimizing Harvest Area Perimeters. *Silva Fenn*. **2010**, *44*, 77–89.
131. Öhman, K.; Lämås, T. Clustering of harvest activities in multi-objective long-term forest planning. *For. Ecol. Manag*. **2003**, *176*, 161–171.
132. Öhman, K.; Lamas, T. Reducing forest fragmentation in long-term forest planning by using the shape index. *For. Ecol. Manag*. **2005**, *212*, 346–357.
133. Öhman, K.; Wikström, P. Incorporating aspects of habitat fragmentation into long-term forest planning using mixed integer programming. *For. Ecol. Manag*. **2008**, *255*, 440–446.
134. Orsi, F.; Church, R.L.; Geneletti, D. Environmental Modelling & Software Restoring forest landscapes for biodiversity conservation and rural livelihoods: A spatial optimisation model. *Environ. Model. Softw*. **2011**, *26*, 1622–1638.
135. Peralvo, M.; Sierra, R.; Young, K.R.; Ulloa, C.U. Identification of Biodiversity Conservation Priorities using Predictive Modeling: An Application for the Equatorial Pacific Region of South America. *Biodivers. Conserv*. **2007**, *16*, 2649–2675.
136. Porto, M.; Correia, O.; Beja, P. Optimization of landscape services under uncoordinated management by multiple landowners. *PLoS ONE* **2014**, *9*, e86001.
137. Pukkala, T.; Heinonen, T.; Kurttila, M. An Application of a Reduced Cost Approach to Spatial Forest Planning. *For. Sci*. **2009**, *55*, 13–22.
138. Pukkala, T.; Kangas, J.; Kniivilä, M.; Tiainen, A. Integrating Forest-level and Compartment-level Indices of Species Diversity with Numerical Forest Planning. *Silva Fenn*. **1997**, *31*, 417–429.
139. Pukkala, T.; Kurttila, M. Examining the Performance of Six Heuristic Optimisation Techniques in Different Forest Planning Problems. *Silva Fenn*. **2005**, *39*, 67–80.
140. Ramage, B.S.; Kitzes, J.; Marshalek, E.C.; Potts, M.D. Optimized Floating Refugia: A new strategy for species conservation in production forest landscapes. *Biodivers. Conserv*. **2013**, *22*, 789–801.
141. Rebain, S.; Mcdill, M.E. A Mixed-Integer Formulation of the Minimum Patch Size Problem. *For. Sci*. **2003**, *49*, 608–618.
142. Rebain, S.; Mcdill, M.E. Can mature patch constraints mitigate the fragmenting effects of harvest opening size restrictions? *Int. Trans. Oper. Res*. **2003**, *10*, 499–513.
143. Regan, H.M.; Davis, F.W.; Andelman, S.J.; Widyanata, A.; Freese, M. Comprehensive criteria for biodiversity evaluation in conservation planning. *Biodivers. Conserv*. **2007**, *16*, 2715–2728.
144. Rojas Ponce, Y.; Ruiz-Tagle, M.; García-Robredo, F.; Solana Gutiérrez, J. Multiple-use forest planning model for second-growth forests of roble–raulí–coihue (genus Nothofagus). *Eur. J. For. Res*. **2010**, *129*, 947–960.
145. Rothley, K.D. Designing bioreserve networks to satisfy multiple conflicting demands. *Ecol. Appl*. **1999**, *9,* 741–750.
146. Sabatini, M.C.; Verdiell, A.; Rodríguez Iglesias, R.M.; Vidal, M. A quantitative method for zoning of protected areas and its spatial ecological implications. *J. Environ. Manag*. **2007**, *83*, 198–206.
147. Schapaugh, A.W.; Tyre, A.J. Bayesian networks and the quest for reserve adequacy. *Biol. Conserv*. **2012**, *152*, 178–186.
148. Schapaugh, A.W.; Tyre, A.J. Maximizing a new quantity in sequential reserve selection. *Environ. Conserv*. **2014**, *41*, 198–205.
149. Schröter, M.; Rusch, G.M.; Barton, D.N.; Blumentrath, S.; Nordén, B. Ecosystem Services and Opportunity Costs Shift Spatial Priorities for Conserving Forest Biodiversity. *PLoS ONE* **2014**, *9*, e112557.
150. Schwenk, W.S.; Donovan, T.M.; Keeton, W.S.; Nunery, J.S. Carbon storage, timber production, and biodiversity: Comparing ecosystem services with multi-criteria decision analysis. *Ecol. Appl*. **2012**, *22*, 1612–1627.
151. Seidl, R.; Rammer, W.; Lexer, M.J. Climate change vulnerability of sustainable forest management in the Eastern Alps. *Clim. Chang.* **2011**, *106*, 225–254.
152. Sharafi, S.M.; Moilanen, A.; White, M.; Burgman, M. Integrating environmental gap analysis with spatial conservation prioritization: A case study from Victoria, Australia. *J. Environ. Manag*. **2012**, *112*, 240–251.
153. Siitonen, P.; Tanskanen, A.; Lehtinen, A. Selecting forest reserves with a multiobjective spatial algorithm. *Environ. Sci. Policy* **2003**, *6*, 301–309.
154. Snyder, S.; Tyrrel, L.E.; Haight, R.G. An Optimization Approach to Selecting Research Natural Areas in National Forests. *For. Sci*. **1999**, *45*, 458–469.
155. Snyder, S.; ReVelle, C. Multiobjective grid packing model: An application in forest management. *Ecol. Appl*. **1998**, *5*, 165–180.
156. Stirn, L.Z. Integrating the fuzzy analytic hierarchy process with dynamic programming approach for determining the optimal forest management decisions. *Ecol. Model*. **2005**, *194*, 296–305.
157. Store, R.; Jokimäki, J. A GIS-based multi-scale approach to habitat suitability modeling. *Ecol. Model*. **2003**, *169*, 1–15.
158. Strager, M.P.; Rosenberger, R.S. Incorporating stakeholder preferences for land conservation: Weights and measures in spatial MCA. *Ecol. Econ*. **2006**, *57*, 627–639.
159. Strange, N.; Thorsen, B.J.; Bladt, J. Optimal reserve selection in a dynamic world. *Biol. Conserv*. **2006**, *131*, 33–41.
160. Tecle, A.; Shrestha, B.P.; Duckstein, L. A Multiobjective Decision Support System for Multiresource Forest Management. *Group Decis. Negot*. **1998**, *7*, 23–40.
161. Thomson, E.F.; Halterman, B.G.; Lyon, T.J.; Miller, R.L. Integrating timber and wildlife management planning. *For. Chron*. **1973**, *49,* 247–250.
162. Tóth, S.F.; Ettl, G.J.; Rabotyagov, S.S.; Rogers, L.W.; Comnick, J.M. ECOSEL: Multi-objective optimization to sell forest ecosystem services. *For. Policy Econ*. **2013**, *35*, 73–82.
163. Tóth, S.F.; Mcdill, M.E. Promoting Large, Compact Mature Forest Patches in Harvest Scheduling Models. *Environ. Model. Asses*. **2008**, *13*, 1–15.
164. Tóth, S.F.; Mcdill, M.E. Finding Efficient Harvest Schedules under Three Conflicting Objectives. *For. Sci*. **2009**, *55*, 117–131.
165. Tóth, S.F.; Mcdill, M.E.; Rebain, S. Finding the Efficient Frontier of a Bi-Criteria, Spatially Explicit, Harvest Scheduling Problem. *For. Sci*. **2006**, *52*, 93–107.
166. Turner, B.J.; Chikumbo, O.; Davey, S.M. Optimisation modelling of sustainable forest management at the regional level: An Australian example. *Ecol. Model*. **2002**, *153*, 157–179.
167. Van Der Horst, D.; Gimona, A. Where new farm woodlands support biodiversity action plans: A spatial multi-criteria analysis. *Biol. Conserv*. **2005**, *123*, 421–432.
168. Venema, H.D.; Calamai, P.H.; Fieguth, P. Forest structure optimization using evolutionary programming and landscape ecology metrics. *Eur. J. Oper. Res*. **2005**, *164*, 423–439.
169. Wei, Y.; Hoganson, H.M. Scheduling forest core area production using mixed integer programming. *Can. J. For. Res*. **2007**, *37*, 1924–1932.
170. Wikström, P.; Eriksson, L.O. Solving the stand management problem under biodiversity-related considerations. *For. Ecol. Manag*. **2000**, *126*, 361–376.
171. Williams, B.K.; Johnson, F.A. Confronting dynamics and uncertainty in optimal decision making for conservation. *Environ. Res. Lett*. **2013**, *8*, 025004.
172. Williams, K.J.; Reeson, A.F.; Drielsma, M.J.; Love, J. Optimised whole-landscape ecological metrics for effective delivery of connectivity-focused conservation incentive payments. *Ecol. Econ*. **2012**, *81*, 48–59.
173. Wintle, B.A.; Bekessy, S.A.; Keith, D.A.; van Wilgen, B.W.; Cabeza, M.; Schröder, B.; Carvalho, S.B.; Falcucci, A.; Maiorano, L.; Regan, T.J.; et al. Ecological–economic optimization of biodiversity conservation under climate change. *Nat. Clim. Chang*. **2011**, *1*, 355–359.
174. Yan, H.; Zhan, J.; Liu, B.; Huang, W.; Li, Z. Spatially explicit assessment of ecosystem resilience: An approach to adapt to climate changes. *Adv. Meteorol*. **2014**, 798428, doi:10.1155/2014/798428.
175. Yousefpour, R.; Hanewinkel, M. Modelling of forest conversion planning with an adaptive simulation-optimization approach and simultaneous consideration of the values of timber, carbon and biodiversity. *Ecol. Econ*. **2009**, *68*, 1711–1722.
176. Zhang, H.; Constantino, M.; Falcão, A. Modeling forest core area with integer programming. *Ann. Oper. Res*. **2011**, *190*, 41–55.
177. Zhou, M.; Buongiorno, J. Forest landscape management in a stochastic environment, with an application to mixed loblolly pine–hardwood forests. *For. Ecol. Manag*. **2006**, *223*, 170–182.
178. Zhou, W.; Gong, P. Multiple-use tradeoffs in Swedish mountain region forests. *For. Policy Econ*. **2005**, *7*, 39–52.
179. Zhu, J.; Bettinger, P.; Li, R. Additional Insight into the Performance of a New Heuristic for Solving Spatially Constrained Forest Planning Problems. *Silva Fenn*. **2007**, *41*, 687–698.
